# Supplementary material for: High Levels of Antibiotic Resistance in MDR-Strong Biofilm-Forming Salmonella Typhimurium ST34 in Southern China
Source: MDPI journal article supplement (doi:10.3390/microorganisms11082005), 2023-08-03
Supplement: s1 [file s1]

**Table S1.** Biofilm formation of the 295 *S. Typhimurium* isolates.

| Biofilm Formation | Source (%)  |             | Total Number of Isolates |
|-------------------|-------------|-------------|--------------------------|
|                   | Food        | Human       |                          |
| None              | 6 (4.58%)   | 16 (9.76%)  | 22 (7.46%)               |
| Weak              | 33 (25.19%) | 19 (11.59%) |                          |
| Moderate          | 10 (7.63%)  | 33 (20.12%) | 273 (92.54%)             |
| Strong            | 82 (62.60%) | 96 (58.54%) |                          |
| Total number      | 131         | 164         | 295                      |

**Table S2.** Antimicrobial resistance in *S. Typhimurium* isolates from patients.

| Regions            | Percentage (%) of Resistant Isolates |       |        |        |       |        |         |        |        |         |        |       |        |         |       |
|--------------------|--------------------------------------|-------|--------|--------|-------|--------|---------|--------|--------|---------|--------|-------|--------|---------|-------|
|                    | AMP                                  | FEP   | CTX    | CN     | AK    | STR    | NAL     | CIP    | OFX    | FFC     | C      | PB    | SUL    | TET     | IPM   |
| Shanghai (n = 88)  | 76.14%                               | 1.14% | 9.09%  | 27.27% | 0.00% | 44.32% | 55.68%  | 15.91% | 7.95%  | 55.68%  | 51.14% | 3.41% | 82.95% | 53.41%  | 0.00% |
| Chongqing (n = 45) | 95.56%                               | 0.00% | 37.78% | 26.67% | 0.00% | 48.89% | 62.22%  | 33.33% | 17.78% | 68.89%  | 68.89% | 4.44% | 93.33% | 60.00%  | 0.00% |
| Guangxi (n = 29)   | 82.76%                               | 0.00% | 17.24% | 51.72% | 0.00% | 31.03% | 100.00% | 31.03% | 27.59% | 100.00% | 65.52% | 3.45% | 89.66% | 100.00% | 0.00% |
| Total (n = 162)    | 82.72%                               | 0.62% | 18.52% | 31.48% | 0.00% | 43.21% | 65.43%  | 23.46% | 14.20% | 67.28%  | 58.64% | 3.70% | 87.04% | 63.58%  | 0.00% |

**Table S3.** Antimicrobial resistance in *S. Typhimurium* isolates from Food.

| Regions            | Percentage (%) of Resistant Isolates |       |       |        |       |        |         |        |        |         |        |       |         |         |       |
|--------------------|--------------------------------------|-------|-------|--------|-------|--------|---------|--------|--------|---------|--------|-------|---------|---------|-------|
|                    | AMP                                  | FEP   | CTX   | CN     | AK    | STR    | NAL     | CIP    | OFX    | FFC     | C      | PB    | SUL     | TET     | IPM   |
| Guangdong (n = 72) | 27.78%                               | 2.78% | 2.78% | 31.94% | 0.00% | 56.94% | 51.39%  | 13.89% | 23.61% | 66.67%  | 51.39% | 4.17% | 81.94%  | 100.00% | 0.00% |
| Shanghai (n = 36)  | 61.11%                               | 2.78% | 5.56% | 25.00% | 0.00% | 33.33% | 75.00%  | 13.89% | 16.67% | 52.78%  | 44.44% | 0.00% | 77.78%  | 72.22%  | 2.78% |
| Sichuan (n = 25)   | 96.00%                               | 0.00% | 4.00% | 4.00%  | 0.00% | 92.00% | 100.00% | 8.00%  | 84.00% | 100.00% | 4.00%  | 0.00% | 100.00% | 100.00% | 0.00% |
| Total (n = 133)    | 49.62%                               | 2.26% | 3.76% | 24.81% | 0.00% | 57.14% | 66.92%  | 12.78% | 33.08% | 69.17%  | 40.60% | 2.26% | 84.21%  | 92.48%  | 0.75% |

**Table S4.** Antimicrobial resistance of Different STs of *S. Typhimurium*.

| STs    | AMP          | FEP       | CTX         | GEN         | AK        | NAL          | CIP         | OFX         | FFC          | C            | STR          | PB        | SUL          | TET          | IPM       |
|--------|--------------|-----------|-------------|-------------|-----------|--------------|-------------|-------------|--------------|--------------|--------------|-----------|--------------|--------------|-----------|
| ST19   | 15 (31.91%)  | 1 (2.13%) | 1 (2.13%)   | 4 (8.51%)   | 0 (0.00%) | 15 (31.91%)  | 0 (0.00%)   | 1 (2.13%)   | 20 (42.55%)  | 19 (40.43%)  | 10 (21.28%)  | 0 (0.00%) | 30 (63.83%)  | 17 (36.17%)  | 0 (0.00%) |
| ST34   | 184 (75.31%) | 3 (1.23%) | 32 (13.17%) | 80 (32.92%) | 0 (0.00%) | 179 (73.66%) | 55 (22.63%) | 66 (27.16%) | 184 (75.72%) | 130 (53.50%) | 136 (55.97%) | 9 (3.70%) | 223 (91.77%) | 209 (86.01%) | 1 (0.41%) |
| ST36   | 2 (100.00%)  | 0.00%     | 2 (100.00%) | 0.00%       | 0 (0.00%) | 0 (0.00%)    | 0 (0.00%)   | 0 (0.00%)   | 0 (0.00%)    | 0 (0.00%)    | 0 (0.00%)    | 0 (0.00%) | 0 (0.00%)    | 0 (0.00%)    | 0 (0.00%) |
| ST99   | 0 (0.00%)    | 0 (0.00%) | 0 (0.00%)   | 0 (0.00%)   | 0 (0.00%) | 0 (0.00%)    | 0 (0.00%)   | 0 (0.00%)   | 0 (0.00%)    | 0 (0.00%)    | 0 (0.00%)    | 0 (0.00%) | 0 (0.00%)    | 0 (0.00%)    | 0 (0.00%) |
| ST1557 | 0 (0.00%)    | 0 (0.00%) | 0 (0.00%)   | 0 (0.00%)   | 0 (0.00%) | 2 (100.00%)  | 0 (0.00%)   | 0 (0.00%)   | 0 (0.00%)    | 0 (0.00%)    | 0 (0.00%)    | 0 (0.00%) | 0 (0.00%)    | 0 (0.00%)    | 0 (0.00%) |
| Total  | 201 (68.14%) | 4 (1.36%) | 35 (11.86%) | 84 (28.47%) | 0 (0.00%) | 196 (66.44%) | 55 (18.64%) | 67 (22.71%) | 204 (69.15%) | 149 (50.51%) | 146 (49.49%) | 9 (3.05%) | 253 (85.76%) | 226 (76.61%) | 1 (0.34%) |

**Table S5.** Drug resistance Pattern of *S. Typhimurium* ST34.

| MDR | Pattern (93) | Number (%) |
|-----|--------------|------------|
| 1   | TE           | 4 (1.65%)  |
|     | NA           | 1 (0.41%)  |
|     | AMP          | 1 (0.41%)  |
|     | SUL          | 1 (0.41%)  |
| 2   | NA+TE        | 1 (0.41%)  |
|     | NA+OFX+TE    | 1 (0.41%)  |
|     | S+TE         | 1 (0.41%)  |
|     | C+NA         | 1 (0.41%)  |
|     | AMP+SUL      | 4 (1.65%)  |
|     | SUL+TE       | 1 (0.41%)  |
|     | AMP+CTX+TE   | 1 (0.41%)  |

|   |                                 |            |
|---|---------------------------------|------------|
| 3 | NA+FFC+TE                       | 6 (2.47%)  |
|   | S+SUL+TE                        | 9 (3.70%)  |
|   | C+FFC+SUL+TE                    | 1 (0.41%)  |
|   | AMP+S+SUL                       | 14 (5.76%) |
|   | AMP+NA+SUL                      | 2 (0.82%)  |
|   | AMP+S+CTX+SUL                   | 2 (0.82%)  |
|   | AMP+SUL+TE                      | 1 (0.41%)  |
|   | AMP+C+FFC+SUL                   | 1 (0.41%)  |
| 4 | NA+FFC+SUL+TE                   | 2 (0.82%)  |
|   | C+NA+FFC+SUL+TE                 | 1 (0.41%)  |
|   | AMP+CTX+NA+FFC+TE               | 1 (0.41%)  |
|   | S+FFC+SUL+TE                    | 1 (0.41%)  |
|   | S+NA+SUL+TE                     | 1 (0.41%)  |
|   | C+S+FFC+SUL+TE                  | 8 (3.29%)  |
|   | AMP+FEP+S+CTX+SUL+TE            | 2 (0.82%)  |
|   | AMP+S+NA+SUL                    | 2 (0.82%)  |
|   | AMP+C+NA+SUL                    | 1 (0.41%)  |
|   | AMP+S+CTX+SUL+TE                | 1 (0.41%)  |
|   | AMP+S+SUL+TE                    | 6 (2.47%)  |
|   | AMP+NA+SUL+TE                   | 2 (0.82%)  |
|   | AMP+C+NA+FFC+SUL                | 1 (0.41%)  |
|   | AMP+C+NA+CIP+FFC+SUL+TE         | 5 (2.06%)  |
|   | C+CN+NA+FFC+SUL+TE              | 4 (1.65%)  |
|   | AMP+C+NA+FFC+SUL+TE             | 9 (3.70%)  |
| 5 | AMP+C+CTX+NA+FFC+SUL+TE         | 1 (0.41%)  |
|   | CN+NA+FFC+SUL+TE                | 1 (0.41%)  |
|   | AMP+NA+FFC+SUL+TE               | 5 (2.06%)  |
|   | AMP+CTX+NA+FFC+SUL+TE           | 2 (0.82%)  |
|   | AMP+C+NA+CIP+OFX+FFC+SUL+TE     | 2 (0.82%)  |
|   | S+NA+OFX+FFC+SUL+TE             | 1 (0.41%)  |
|   | AMP+NA+OFX+FFC+SUL+TE           | 1 (0.41%)  |
|   | S+NA+FFC+SUL+TE                 | 2 (0.82%)  |
|   | C+CN+NA+OFX+FFC+SUL+TE          | 1 (0.41%)  |
|   | AMP+S+NA+SUL+TE                 | 1 (0.41%)  |
|   | S+CN+NA+FFC+TE                  | 1 (0.41%)  |
|   | C+NA+CIP+OFX+PB+SUL+TE          | 1 (0.41%)  |
|   | C+S+CN+FFC+SUL+TE               | 1 (0.41%)  |
|   | C+CN+NA+CIP+OFX+FFC+SUL+TE      | 1 (0.41%)  |
|   | AMP+C+S+CTX+CN+FFC+SUL          | 1 (0.41%)  |
|   | ACSSuT+CTX+FFC                  | 2 (0.82%)  |
| 6 | AMP+C+CTX+NA+CIP+OFX+FFC+SUL+TE | 1 (0.41%)  |
|   | AMP+S+CTX+NA+FFC+SUL+TE         | 1 (0.41%)  |
|   | AMP+C+CTX+NA+FFC+PB+SUL+TE      | 1 (0.41%)  |

|   |                                       |            |
|---|---------------------------------------|------------|
|   | C+S+CN+NA+FFC+SUL+TE                  | 4 (1.65%)  |
|   | AMP+C+CN+NA+CIP+FFC+SUL+TE            | 5 (2.06%)  |
|   | AMP+C+CTX+CN+NA+FFC+SUL+TE            | 1 (0.41%)  |
|   | AMP+CN+NA+FFC+SUL+TE                  | 2 (0.82%)  |
|   | AMP+C+NA+CIP+FFC+PB+SUL+TE            | 1 (0.41%)  |
|   | ACSSuT+NA+CIP+FFC                     | 4 (1.65%)  |
|   | AMP+C+CN+NA+FFC+SUL+TE                | 7 (2.88%)  |
|   | AMP+C+CN+NA+CIP+OFX+FFC+SUL+TE        | 12 (4.94%) |
|   | AMP+C+CTX+NA+CIP+OFX+FFC+PB+SUL+TE    | 1 (0.41%)  |
|   | AMP+C+CTX+CN+NA+CIP+FFC+SUL+TE        | 1 (0.41%)  |
|   | ACSSuT+NA+FFC                         | 6 (2.47%)  |
|   | AMP+S+NA+FFC+SUL+TE                   | 6 (2.47%)  |
|   | AMP+C+CTX+CN+NA+CIP+OFX+FFC+SUL+TE    | 1 (0.41%)  |
|   | AMP+S+NA+OFX+FFC+SUL+TE               | 18 (7.41%) |
|   | AMP+S+CTX+NA+CIP+OFX+FFC+SUL+TE       | 1 (0.41%)  |
|   | AMP+S+NA+CIP+OFX+FFC+SUL+TE           | 1 (0.41%)  |
|   | C+S+CN+NA+CIP+OFX+FFC+SUL+TE          | 1 (0.41%)  |
|   | AMP+C+CN+NA+OFX+FFC+SUL+TE            | 2 (0.82%)  |
|   | AMP+C+S+CN+NA+FFC+TE                  | 1 (0.41%)  |
|   | ACSSuT+NA+OFX+FFC                     | 1 (0.41%)  |
|   | AMP+C+S+CN+NA+FFC+SUL                 | 1 (0.41%)  |
|   | AMP+C+S+CN+OFX+FFC+SUL                | 1 (0.41%)  |
|   | ACSSuT+AMP+C+S+CTX+CN+FFC             | 1 (0.41%)  |
|   | ACSSuT+CTX+NA+CIP+OFX+FFC             | 2 (0.82%)  |
|   | ACSSuT+NA+CIP+OFX+FFC                 | 2 (0.82%)  |
|   | ACSSuT+CTX+NA+FFC                     | 1 (0.41%)  |
|   | AMP+S+NA+FFC+PB+SUL+TE                | 1 (0.41%)  |
|   | AMP+S+CN+NA+FFC+SUL+TE                | 1 (0.41%)  |
|   | AMP+C+CN+NA+FFC+PB+SUL+TE             | 1 (0.41%)  |
|   | ACSSuT+CN+NA+FFC                      | 10 (4.12%) |
|   | AMP+C+CN+NA+CIP+FFC+PB+SUL+TE         | 1 (0.41%)  |
|   | ACSSuT+CTX+CN+NA+FFC                  | 2 (0.82%)  |
| 7 | ACSSuT+CN+NA+OFX+FFC                  | 2 (0.82%)  |
|   | AMP+FEP+C+CTX+CN+IPM+NA+FFC+SUL+TE    | 1 (0.41%)  |
|   | ACSSuT+CTX+CN+NA+OFX+FFC              | 1 (0.41%)  |
|   | ACSSuT+CTX+CN+NA+CIP+FFC              | 1 (0.41%)  |
|   | ACSSuT+CN+NA+CIP+OFX+FFC              | 9 (3.70%)  |
|   | AMP+C+CTX+CN+NA+CIP+OFX+FFC+PB+SUL+TE | 1 (0.41%)  |
|   | ACSSuT+CTX+NA+CIP+OFX+FFC+PB          | 1 (0.41%)  |

**Table S6.** Drug resistance Pattern of *Salmonella* Typhimurium ST19.

| MDR | Pattern (22) | Number (%) |
|-----|--------------|------------|
| 0   | -            | 8 (17.02%) |
| 1   | NAL          | 4 (8.51%)  |

|   |                     |            |
|---|---------------------|------------|
|   | SUL                 | 1 (2.13%)  |
|   | FFC                 | 1 (2.13%)  |
|   | TE                  | 4 (8.51%)  |
| 2 | C+SUL               | 1 (2.13%)  |
|   | AMP+FEP+CTX+SUL     | 1 (2.13%)  |
|   | C+FFC+SUL           | 1 (2.13%)  |
|   | NAL+SUL             | 3 (6.38%)  |
| 3 | AMP+S+NAL+SUL       | 1 (2.13%)  |
|   | AMP+C+FFC+SUL       | 3 (6.38%)  |
|   | C+FFC+SUL+TE        | 4 (8.51%)  |
|   | OFX+SUL+TE          | 1 (2.13%)  |
| 4 | AMP+C+S+FFC+SUL     | 5 (10.64%) |
|   | S+NAL+SUL+TE        | 1 (2.13%)  |
|   | AMP+C+FFC+SUL+TE    | 1 (2.13%)  |
|   | C+NAL+FFC+SUL+TE    | 1 (2.13%)  |
| 5 | S+CN+NAL+FFC+SUL+TE | 1 (2.13%)  |
|   | AMP+C+S+CN+FFC+SUL  | 1 (2.13%)  |
|   | AMP+S+NAL+SUL+TE    | 2 (4.26%)  |
|   | C+CN+NAL+FFC+SUL+TE | 1 (2.13%)  |
| 7 | ACSSuT+CN+NAL+FFC   | 1 (2.13%)  |

---
